# Supplementary material for: Monitoring childbirth care in primary health facilities: a validity study in Gombe State, northeastern Nigeria
Source: PubMed Central journal article supplement (PMC6657002; doi:10.7189/jogh.09.020411), 2019-12
Supplement: jogh-09-020411-s001.pdf [file jogh-09-020411-s001.pdf]

Table S1. Childbirth care indicators assessed across data recording methods

| Data recording method                                                      | Childbirth care indicator item/question                                                                |
|----------------------------------------------------------------------------|--------------------------------------------------------------------------------------------------------|
| <b><i>Birth attendance and companionship during labor and delivery</i></b> |                                                                                                        |
| <u><i>Main provider – doctor, nurse, or midwife</i></u>                    |                                                                                                        |
| Facility exit interview,<br>Household follow-up interview                  | Thinking about the main person helping you during birth, what was the cadre of that person?            |
| Maternity register                                                         | Who took delivery of the child?                                                                        |
| <u><i>More than one provider present at birth</i></u>                      |                                                                                                        |
| Facility exit interview,<br>Household follow-up interview                  | Did more than one health worker assist with the birth?                                                 |
| <u><i>Support person present at birth</i></u>                              |                                                                                                        |
| Facility exit interview,<br>Household follow-up interview                  | Did you have a support person present during labor and childbirth?                                     |
| <b><i>Care for the woman</i></b>                                           |                                                                                                        |
| <u><i>Maternal age at delivery (adolescent births)</i></u>                 |                                                                                                        |
| Maternity register                                                         | Age                                                                                                    |
| <u><i>Prior parity (prior parity, four or more births)</i></u>             |                                                                                                        |
| Maternity register                                                         | Parity                                                                                                 |
| <u><i>Woman allowed to move and change position during labor</i></u>       |                                                                                                        |
| Facility exit interview,<br>Household follow-up interview                  | Were you encouraged to move and change position during labor?                                          |
| <u><i>Woman allowed to drink liquids and eat during labor</i></u>          |                                                                                                        |
| Facility exit interview,<br>Household follow-up interview                  | Were you encouraged to have some light food during labor and delivery?                                 |
| <u><i>Woman allowed to deliver in preferred position</i></u>               |                                                                                                        |
| Facility exit interview,<br>Household follow-up interview                  | Were you allowed to deliver in the position you wanted to deliver?                                     |
| <u><i>Woman allowed to have a support person at birth</i></u>              |                                                                                                        |
| Facility exit interview,<br>Household follow-up interview                  | Were you encouraged to have a support person present during labor and childbirth?                      |
| <u><i>Birth attendant washes hands with soap before examinations</i></u>   |                                                                                                        |
| Facility exit interview,<br>Household follow-up interview                  | Did the birth attendant wash his/her hands with soap and water or use antiseptic before examining you? |
| <u><i>Birth attendant wears gloves during examinations</i></u>             |                                                                                                        |
| Facility exit interview,<br>Household follow-up interview                  | Did the birth attendant wear gloves when examining you?                                                |

|                                                                                                          |                                                                                                                                                                                                                                      |
|----------------------------------------------------------------------------------------------------------|--------------------------------------------------------------------------------------------------------------------------------------------------------------------------------------------------------------------------------------|
| <u>Partograph used to monitor labor and delivery</u>                                                     |                                                                                                                                                                                                                                      |
| Maternity register                                                                                       | Partograph used to monitor labor and delivery?<br>[yes/no]                                                                                                                                                                           |
| <u>Blood pressure taken – initial client assessment</u>                                                  |                                                                                                                                                                                                                                      |
| Facility exit interview,<br>Household follow-up interview                                                | When you were there did anyone check your blood pressure (put a strap around your upper arm and take a measurement)?                                                                                                                 |
| <u>Episiotomy performed</u>                                                                              |                                                                                                                                                                                                                                      |
| Facility exit interview,<br>Household follow-up interview                                                | When you gave birth, did the attendant need to cut your privates to get the baby out (also called an episiotomy)?                                                                                                                    |
| <u>Prophylactic uterotonic administered during third stage of labor to prevent postpartum hemorrhage</u> |                                                                                                                                                                                                                                      |
| Facility exit interview,<br>Household follow-up interview                                                | Immediately after the birth, were you given an injection or drugs to help stop the bleeding? (also called a uterotonic)?                                                                                                             |
| Maternity register                                                                                       | Active management of third stage of labor? [yes/no]                                                                                                                                                                                  |
| <b>Care for the newborn</b>                                                                              |                                                                                                                                                                                                                                      |
| <u>Mother and baby kept in the same room after delivery</u>                                              |                                                                                                                                                                                                                                      |
| Facility exit interview,<br>Household follow-up interview                                                | Were you and the baby kept in the same room after delivery?                                                                                                                                                                          |
| <u>Essential newborn care</u>                                                                            |                                                                                                                                                                                                                                      |
| Facility exit interview,<br>Household follow-up interview                                                | Immediately after the birth, did you put the baby to your breast to help start breastfeeding, with or without the help of the health worker?<br>AND<br>Immediately after the birth, was the baby placed on your body “skin to skin”? |
| Maternity register                                                                                       | Essential newborn care: immediate initiation of breastfeeding, baby kept warm                                                                                                                                                        |
| <u>Newborn immediately dried with a towel</u>                                                            |                                                                                                                                                                                                                                      |
| Facility exit interview,<br>Household follow-up interview                                                | Immediately after the birth, was the baby dried with a towel or cloth?                                                                                                                                                               |
| <u>Newborn immediately placed skin-to-skin</u>                                                           |                                                                                                                                                                                                                                      |
| Facility exit interview,<br>Household follow-up interview                                                | Immediately after the birth, was the baby placed on your body “skin to skin”?                                                                                                                                                        |
| <u>Immediate initiation of breastfeeding</u>                                                             |                                                                                                                                                                                                                                      |
| Facility exit interview,<br>Household follow-up interview                                                | Immediately after the birth, did you put baby to your breast to help start breastfeeding, with or without the help of the health worker?                                                                                             |
| <u>Chlorhexidine applied to newborn's cord to prevent infection</u>                                      |                                                                                                                                                                                                                                      |
| Facility exit interview,<br>Household follow-up interview                                                | Did the health worker put chlorhexidine on the baby's cord to prevent infection?                                                                                                                                                     |
| <u>Baby weighed at birth</u>                                                                             |                                                                                                                                                                                                                                      |

|                                                             |                                                                |
|-------------------------------------------------------------|----------------------------------------------------------------|
| Facility exit interview,<br>Household follow-up interview   | Was your baby weighed at birth?                                |
| Maternity register                                          | <2500 grams or $\geq$ 2500 grams                               |
| <i>Baby's birthweight (Low birthweight, &lt;2500 grams)</i> |                                                                |
| Facility exit interview,<br>Household follow-up interview   | If the baby was weighed, can you tell me the birthweight (kg)? |
| Maternity register                                          | <2500 grams or $\geq$ 2500 grams                               |
| <i>Pre-term birth</i>                                       |                                                                |
| Maternity register                                          | Pre-term birth? [yes/no]                                       |
| <i>Stillbirth, fresh or macerated</i>                       |                                                                |
| Maternity register                                          | Stillbirth, fresh or macerated                                 |
